# Supplementary material for: Effectiveness and Safety of Glucosamine in Osteoarthritis: A Systematic Review
Source: MDPI journal article supplement (doi:10.3390/pharmacy11040117), 2023-07-14
Supplement: s1 [file s1]

# Supplementary Materials: Effectiveness and Safety of Glucosamine in Osteoarthritis: A Systematic Review

Nam Xuan Vo, Ngan Nguyen Hoang Le, Trinh Dang Phuong Chu, Huong Lai Pham, Khang Xuan An Dinh, Uyen Thi Thuc Che, Thanh Thi Thanh Ngo, Tien Thuy Bui

## 3.2. Risk of bias assessment

**Table S1.** Risk of bias following Cochrane criteria.

| No. | References                        | Low / High |
|-----|-----------------------------------|------------|
| 1   | Rindone et al., 2000 [1]          | Low        |
| 2   | Regisnter et al., 2001 [2]        | Low        |
| 3   | Hughes et al., 2002 [3]           | Low        |
| 4   | Pavelka et al., 2002 [4]          | Low        |
| 5   | Cibere et al., 2004 [5]           | Low        |
| 6   | McAlindon et al., 2004 [6]        | Low        |
| 7   | Clegg et al., 2006 [7]            | Low        |
| 8   | Herrero-Beaumont et al., 2007 [8] | Low        |
| 9   | Frestedt et al., 2008 [9]         | Low        |
| 10  | Giodarno et al., 2009 [10]        | Low        |
| 11  | Petersen et al., 2011 [11]        | Low        |
| 12  | Madhu et al., 2013 [12]           | Low        |
| 13  | Nieman et al., 2013 [13]          | Low        |
| 14  | Kwoh et al., 2014 [14]            | Low        |
| 15  | Fransen et al., 2015 [15]         | Low        |

## 3.3. Effectiveness of Glucosamine on Knee osteoarthritis

**Table S2.** The WOMAC score changes of pain in patients of placebo versus treated with glucosamine.

| Study and year                   | Placebo |       |       | Glucosamine |       |       | Std. Mean Difference |                         |
|----------------------------------|---------|-------|-------|-------------|-------|-------|----------------------|-------------------------|
|                                  | Total   | Mean  | SD    | Total       | Mean  | SD    | Weight               | IV, Fixed, 95% CI       |
| Fransen et al., 2015             | 151     | -2.1  | 3.45  | 152         | -22   | 3.55  | 18.8%                | 0.03<br>[-0.20, 0.25]   |
| Nieman et al., 2013              | 51      | -0.9  | 2.86  | 49          | -2.4  | 2.8   | 6.0%                 | -0.53<br>[-0.92, -0.13] |
| Frestedt et al., 2008            | 16      | -2.9  | 22.16 | 19          | -12.3 | 16.26 | 2.1%                 | -0.48<br>[-1.15, 0.02]  |
| Herreo-Beaumont et al., 2007 104 |         | -1.8  | 4.16  | 106         | -2.7  | 3.15  | 12.9%                | -0.24<br>[-0.51, 0.03]  |
| Clegg et al., 2006               | 313     | -86.1 | 114.2 | 317         | -82.9 | 115.4 | 39.1%                | 0.03<br>[-0.13, 0.18]   |
| Cibere et al., 2004              | 66      | -28   | 104   | 71          | -25   | 98    | 8.5%                 | 0.03<br>[-0.31, 0.36]   |

|                        |            |      |     |            |    |     |               |                                      |
|------------------------|------------|------|-----|------------|----|-----|---------------|--------------------------------------|
| McAlindon et al., 2004 | 104        | -2.5 | 3.8 | 101        | -2 | 3.4 | 12.7%         | 0.14<br>[-0.14, 0.41]                |
| <b>Total</b>           | <b>805</b> |      |     | <b>815</b> |    |     | <b>100.0%</b> | <b>-0.04</b><br><b>[-0.13, 0.06]</b> |

**Table S3.** The WOMAC score changes physical function in patients of placebo versus treated with glucosamine.

| Study and year               | Placebo    |        |       | Glucosamine |        |       | Std. Mean Difference |                                      |
|------------------------------|------------|--------|-------|-------------|--------|-------|----------------------|--------------------------------------|
|                              | Total      | Mean   | SD    | Total       | Mean   | SD    | Weight               | IV, Fixed, 95% CI                    |
| Fransen et al., 2015         | 151        | -3.9   | 12.85 | 152         | -3.9   | 12.68 | 19.1%                | 0.00<br>[-0.23, 0.23]                |
| Nieman et al., 2013          | 36         | -3     | 9.34  | 36          | -8.2   | 9.34  | 4.4%                 | -0.55<br>[-1.02, -0.08]              |
| Frestedt et al., 2008        | 16         | -7     | 23.55 | 19          | -10.6  | 16.31 | 2.2%                 | -0.18<br>[-0.84, 0.49]               |
| Herreo-Beaumont et al., 2007 | 104        | -5.5   | 11.45 | 106         | -9.2   | 10.51 | 13.1%                | -0.34<br>[-0.61, -0.06]              |
| Clegg et al., 2006           | 313        | -227.4 | 362.7 | 317         | -222.3 | 388.3 | 39.7%                | 0.01<br>[-0.14, 0.17]                |
| Cibere et al., 2004          | 66         | -63    | 318   | 71          | -58    | 270   | 8.6%                 | 0.02<br>[-0.32, 0.35]                |
| McAlindon et al., 2004       | 104        | -4.6   | 9.6   | 101         | -5.2   | 9.5   | 12.9%                | -0.06<br>[-0.34, 0.21]               |
| <b>Total</b>                 | <b>790</b> |        |       | <b>802</b>  |        |       | <b>100.0%</b>        | <b>-0.07</b><br><b>[-0.17, 0.03]</b> |

**Table S4.** The WOMAC score changes of pain stiffness in patients of placebo versus treated with glucosamine.

| Study and year         | Placebo    |      |     | Glucosamine |      |     | Std. Mean Difference |                                      |
|------------------------|------------|------|-----|-------------|------|-----|----------------------|--------------------------------------|
|                        | Total      | Mean | SD  | Total       | Mean | SD  | Weight               | IV, Fixed, 95% CI                    |
| Giordano et al., 2009  | 30         | 0    | 0.3 | 30          | -1   | 0.3 | 20.4%                | -1.00<br>[-1.15, -0.85]              |
| Frestedt et al., 2008  | 9          | -0.5 | 1.5 | 14          | -0.8 | 1.9 | 8.6%                 | -0.30<br>[-1.70, 1.10]               |
| Clegg et al., 2006     | 313        | -1.5 | 2.1 | 317         | -1.4 | 2.1 | 19.3%                | 0.10<br>[-0.23, 0.43]                |
| McAlindon et al., 2004 | 104        | 0.8  | 1.5 | 101         | 0.7  | 1.6 | 18.4%                | -0.10<br>[-0.52, 0.32]               |
| Pavelka et al., 2002   | 55         | 0.1  | 0.7 | 66          | -0.3 | 1.5 | 18.5%                | -0.40<br>[-0.81, 0.01]               |
| Regisnter et al., 2001 | 71         | 0    | 2.2 | 68          | 0    | 2.3 | 14.8%                | 0.00<br>[-0.75, 0.75]                |
| <b>Total</b>           | <b>582</b> |      |     | <b>596</b>  |      |     | <b>100.0 %</b>       | <b>-0.30</b><br><b>[-0.82, 0.21]</b> |

### 3.4. Safety

#### 3.4.1. Adverse events

**Table S5.** The adverse events comparison between placebo and glucosamine (including patients withdrawn caused of adverse events).

| Study and year                                        | Relative risk (RR)<br>95% CI | Weight %     |
|-------------------------------------------------------|------------------------------|--------------|
| Fransen et al., 2015                                  | 7.33 [0.96, 56.00]           | 0.33         |
| Kwoh et al., 2014                                     | 0.39 [0.13, 1.20]            | 3.53         |
| Rozendaal et al., 2008                                | 2.29 [0.26, 20.13]           | 0.71         |
| Herrero-Beaumont et al., 2007                         | 0.54 [0.19, 1.57]            | 6.18         |
| Clegg et al., 2006                                    | 0.71 [0.31, 1.60]            | 8.97         |
| McAlindon et al., 2004                                | 0.50 [0.07, 3.75]            | 1.83         |
| Pavelka et al., 2002                                  | 1.05 [0.46, 2.39]            | 6.57         |
| Reginster et al., 2001                                | 1.07 [0.70, 1.65]            | 14.26        |
| <b>Total (I<sup>2</sup> = 24.3%, p-value = 0.236)</b> | <b>0.90 [0.66, 1.23]</b>     | <b>42.37</b> |

**Table S6.** Frequency of adverse events reported in patients using Glucosamine Sulphate.

| Study and year                    | Glucosamine Adverse events |            |    |     |    |    |      |        |
|-----------------------------------|----------------------------|------------|----|-----|----|----|------|--------|
|                                   | sulphate (N)               | Infections | MU | CNS | GI | CV | Skin | Others |
| Pavelka et al., 2002 [4]          | 101                        | 29         | 30 | ND  | 25 | 23 | 10   | 14     |
| Noack et al., 1994 [16]           | 126                        | 0          | 0  | 2   | 5  | 0  | 1    | 0      |
| Reginster et al., 2001 [2]        | 106                        | ND         | ND | 31  | 27 | 21 | ND   | 4      |
| McAlindon et al., 2004 [6]        | 101                        | ND         | 5  | 2   | 4  | ND | ND   | 7      |
| Herrero-Beaumont et al., 2007 [8] | 106                        | 12         | 10 | 3   | 11 | ND | ND   | 8      |
| Rozendaal et al., 2008 [17]       | 111                        | ND         | ND | 66  | 58 | 21 | ND   | 7      |
| Hughes et al., 2002 [3]           | 39                         | 1          | 9  | 1   | 0  | ND | 0    | 8      |

\* Abbreviations: ND: no data; GI: gastrointestinal; CV: cardiovascular; CNS: central nervous system; MU: musculoskeletal

## References

1. Rindone, J.P., et al., *Randomized, controlled trial of glucosamine for treating osteoarthritis of the knee*. West J Med, 2000. **172**: p. 91-4.
2. Reginster, J.Y., et al., *Long-term effects of glucosamine sulphate on osteoarthritis progression: a randomised, placebo-controlled clinical trial*. Lancet, 2001. **357**: p. 251-6.
3. Hughes, R. and A. Carr, *A randomized, double-blind, placebo-controlled trial of glucosamine sulphate as an analgesic in osteoarthritis of the knee*. Rheumatology (Oxford), 2002. **41**: p. 279-84.
4. Pavelká, K., et al., *Glucosamine sulfate use and delay of progression of knee osteoarthritis: a 3-year, randomized, placebo-controlled, double-blind study*. Arch Intern Med, 2002. **162**: p. 2113-23.
5. Cibere, J., et al., *Randomized, double-blind, placebo-controlled glucosamine discontinuation trial in knee osteoarthritis*. Arthritis Rheum, 2004. **51**: p. 738-45.
6. McAlindon, T., et al., *Effectiveness of glucosamine for symptoms of knee osteoarthritis: results from an internet-based randomized double-blind controlled trial*. Am J Med, 2004. **117**: p. 643-9.
7. Clegg, D.O., et al., *Glucosamine, chondroitin sulfate, and the two in combination for painful knee osteoarthritis*. N Engl J Med, 2006. **354**: p. 795-808.
8. Herrero-Beaumont, G., et al., *Glucosamine sulfate in the treatment of knee osteoarthritis symptoms: a randomized, double-blind, placebo-controlled study using acetaminophen as a side comparator*. Arthritis Rheum, 2007. **56**: p. 555-67.

9. Frestedt, J.L., et al., *A natural mineral supplement provides relief from knee osteoarthritis symptoms: a randomized controlled pilot trial*. Nutr J, 2008. **17**: p. 9.
10. Giordano, N., et al., *The efficacy and tolerability of glucosamine sulfate in the treatment of knee osteoarthritis: A randomized, double-blind, placebo-controlled trial*. Curr Ther Res Clin Exp, 2009. **70**: p. 185-96.
11. Petersen, S.G., et al., *Nonsteroidal anti-inflammatory drug or glucosamine reduced pain and improved muscle strength with resistance training in a randomized controlled trial of knee osteoarthritis patients*. Arch Phys Med Rehabil, 2011. **92**: p. 1185-93.
12. Madhu, K. and M.J.S. K Chanda, *Safety and efficacy of Curcuma longa extract in the treatment of painful knee osteoarthritis: a randomized placebo-controlled trial*. Inflammopharmacology, 2013. **21**: p. 129-36.
13. Nieman, D.C., et al., *A commercialized dietary supplement alleviates joint pain in community adults: a double-blind, placebo-controlled community trial*. Nutr J, 2013. **12**: p. 154.
14. Kwoh, C.K., et al., *Effect of oral glucosamine on joint structure in individuals with chronic knee pain: a randomized, placebo-controlled clinical trial*. Arthritis Rheumatol, 2014. **66**: p. 930-9.
15. Fransen, M., et al., *Glucosamine and chondroitin for knee osteoarthritis: a double-blind randomised placebo-controlled clinical trial evaluating single and combination regimens*. Ann Rheum Dis, 2015. **74**: p. 851-8.
16. Noack, W., et al., *Glucosamine sulfate in osteoarthritis of the knee*. Osteoarthritis Cartilage, 1994. **2**: p. 51-9.
17. Rozendaal, R.M., et al., *Effect of glucosamine sulfate on hip osteoarthritis: a randomized trial*. Ann Intern Med, 2008. **148**: p. 268-77.
